# Supplementary material
Source: publisher site journal article supplement (https://www.dovepress.com/article/576278)
Supplement: Supplementary file 1 [file 576278%20Supplementary%20Material.docx]

**Supplementary **Table S1.****

**proportion of missing data for key variables at baseline(n =826).**

| Variable | hs-troponin T/  hs-troponin I | NT-pro BNP | UACR | APTT/TT/PT/FIB | SBP/DBP |
| --- | --- | --- | --- | --- | --- |
| Proportion of missing value, n (%) | 405  (49.0%) | 449  (54.36%) | 525  (63.56%) | 95  (11.50%) | 5  (0.61%) |

****Abbreviations:**** UACR, urine albumin-to-creatinine ratio; APTT, activated partial thromboplastin time; TT, thrombin time; PT, prothrombin time; FIB, fibrinogen; SBP, systolic blood pressure; DBP, diastolic blood pressure
